# Supplementary material
Source: publisher figshare collection journal article supplement (https://frontiersin.figshare.com/ndownloader/files/17392097)
Supplement: Supplementary file [file 17392097]

### Supplementary Figure 1

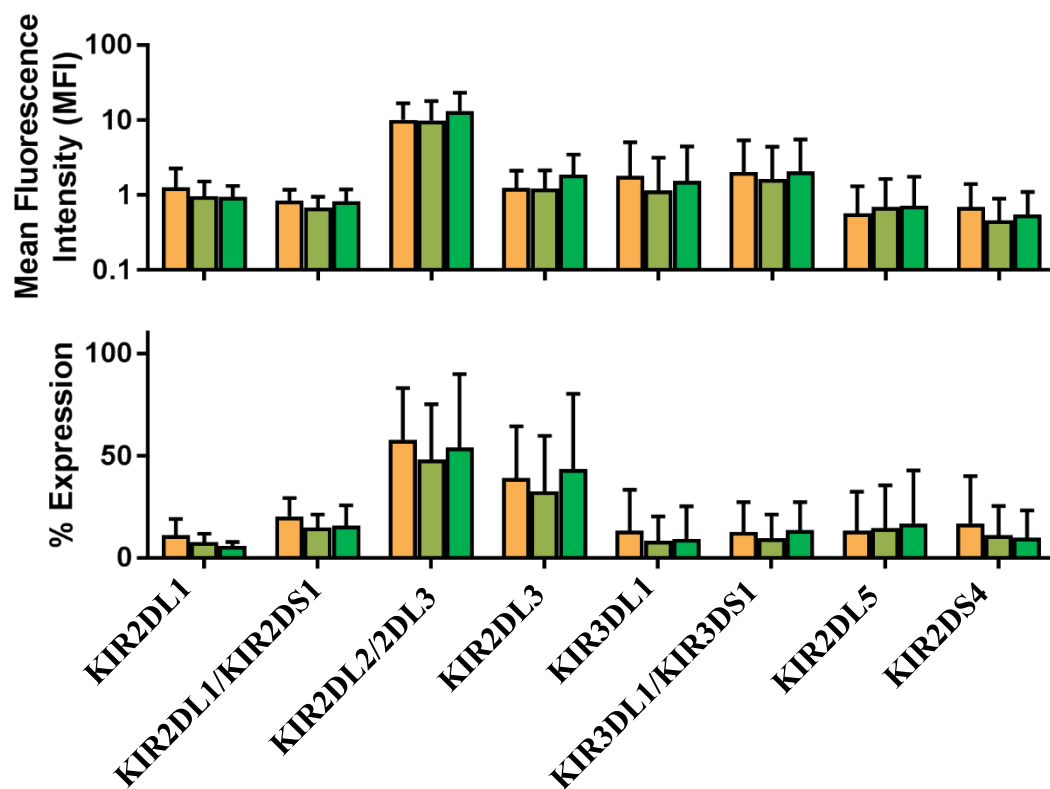

**Supplementary Figure 1.** Shown are expression of different KIRs on different subsets of NK cell on day 3 after transduction. —, indicate proliferative and transduced subset of NK cells; —, indicate proliferative but non-transduced subset NK cells; —, indicate quiescent subset of NK cells.

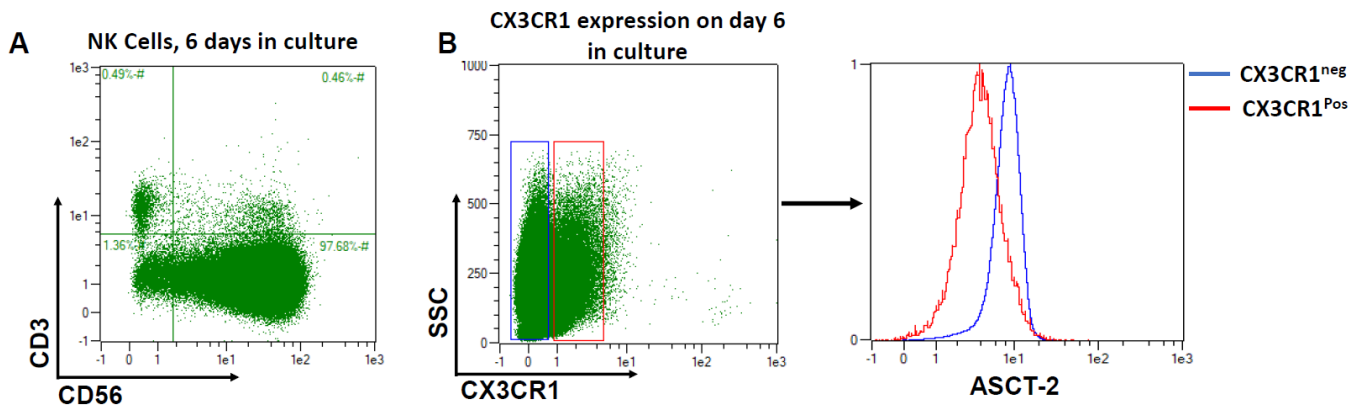

**Supplementary Figure 2.** CX3CR1-negative NK cells express higher amount of ASCT-2 than CX3CR1-positive NK cells. Magnetic separation (Miltenyi Biotec) was used for isolation of NK cells ( $CD3^+/CD56^+$ ) from donor PBMC. Purified NK cells were cultivated for 6 days in NKMACS medium (Miltenyi Biotec) containing 5% human AB serum, 500 U/mL IL-2 and 10 ng/mL IL-15. A) On day 6, NK cells purity was determined by stained with anti-CD3 (Miltenyi Biotec) and anti-CD56 (Miltenyi Biotec). B) NK cells were stained with anti-CX3CR1 (left panel) and ASCT-2 expression in CX3CR1<sup>neg</sup> and CX3CR1<sup>pos</sup> cell populations were determined (right panel) with monoclonal anti-ASCT-2 antibody (Cell Signalling Technology) following the manufacturer protocol.
